# Supplementary material for: Lipocalin-2-mediated ferroptosis as a target for protection against light-induced photoreceptor degeneration
Source: Springer Nature journal article supplement (doi:10.1186/s10020-025-01250-1), 2025-05-15
Supplement: MOESM1 [file 10020_2025_1250_MOESM1_ESM.pdf]

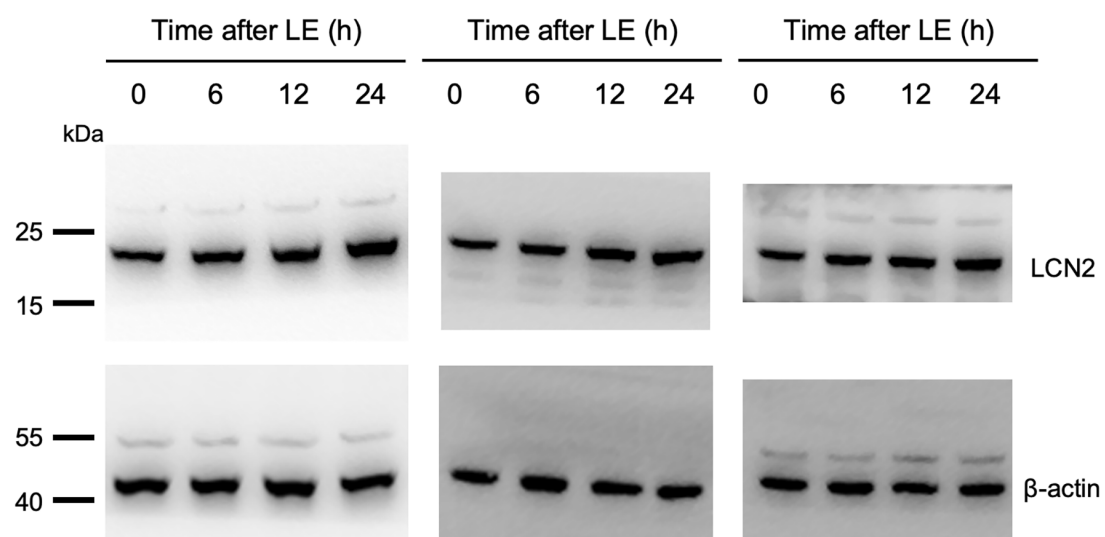

Western blot raw data for Figure 1B

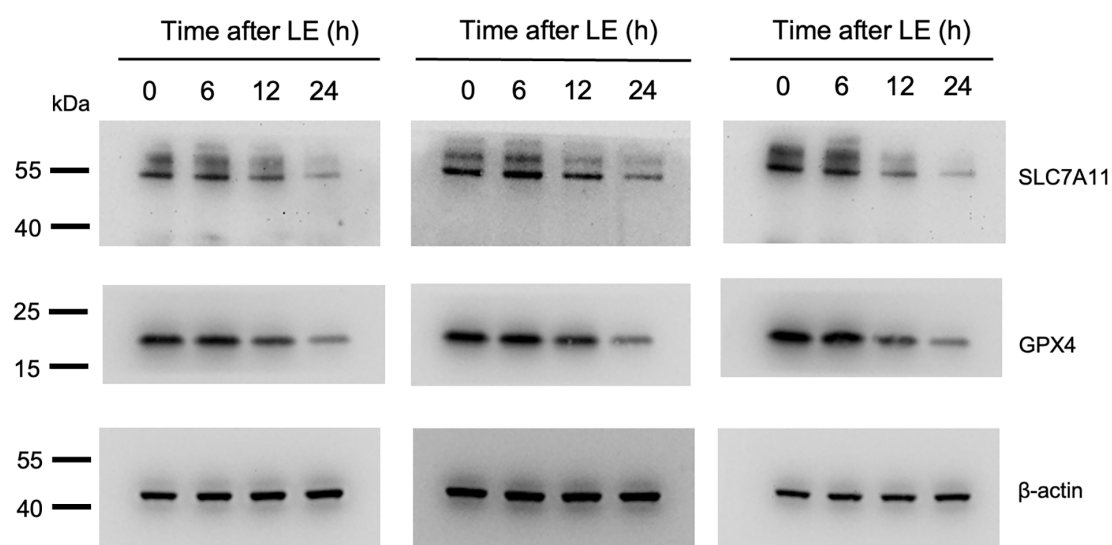

Western blot raw data for Figure 1D

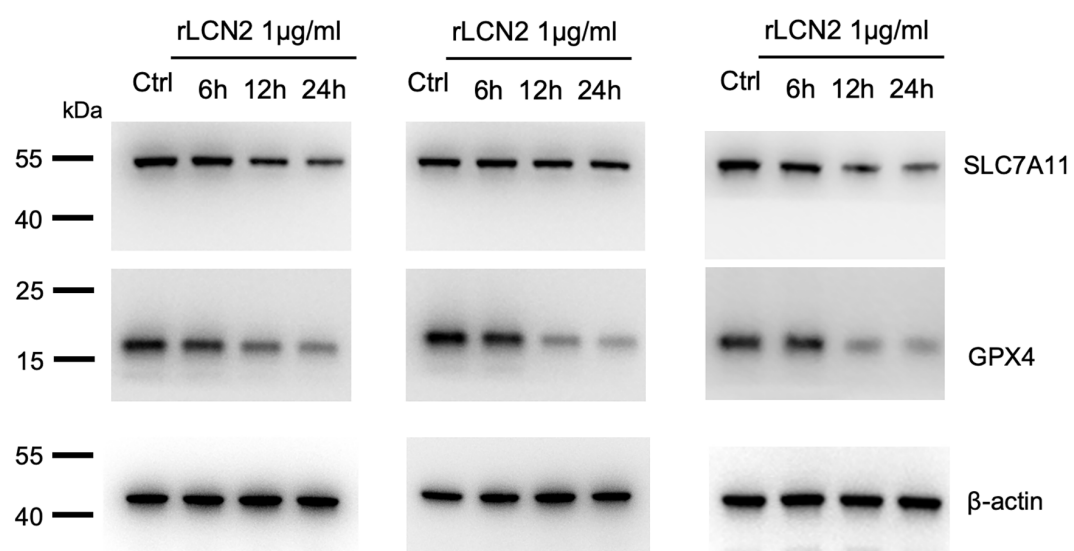

Western blot raw data for Figure 2B

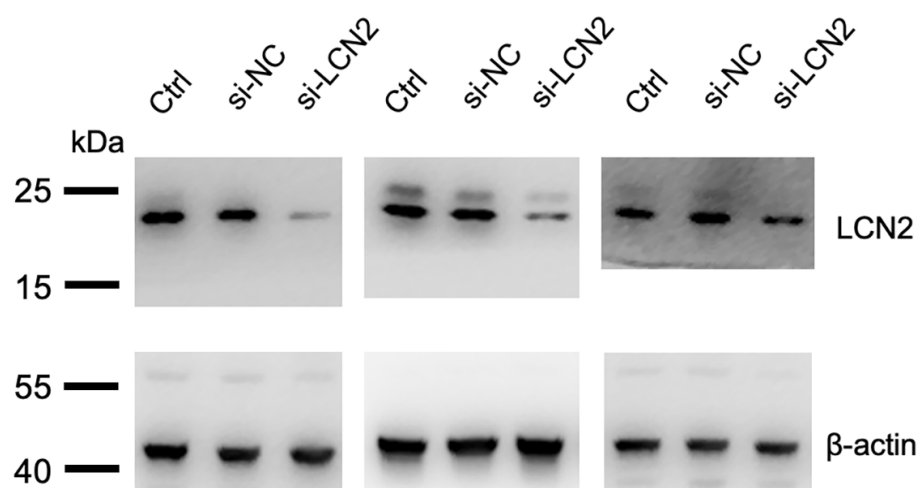

Western blot raw data for Figure 3A

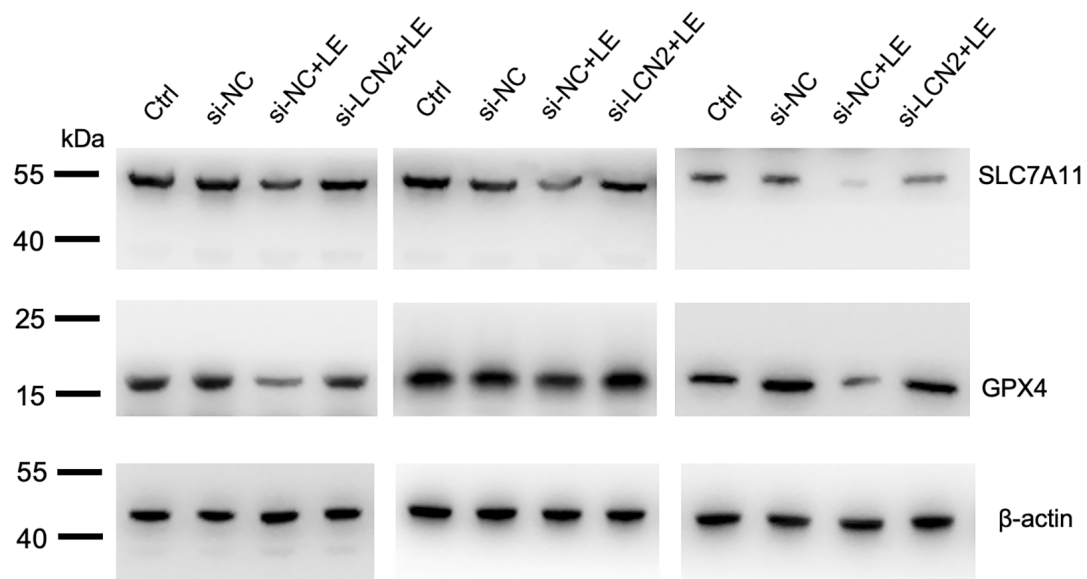

Western blot raw data for Figure 3I

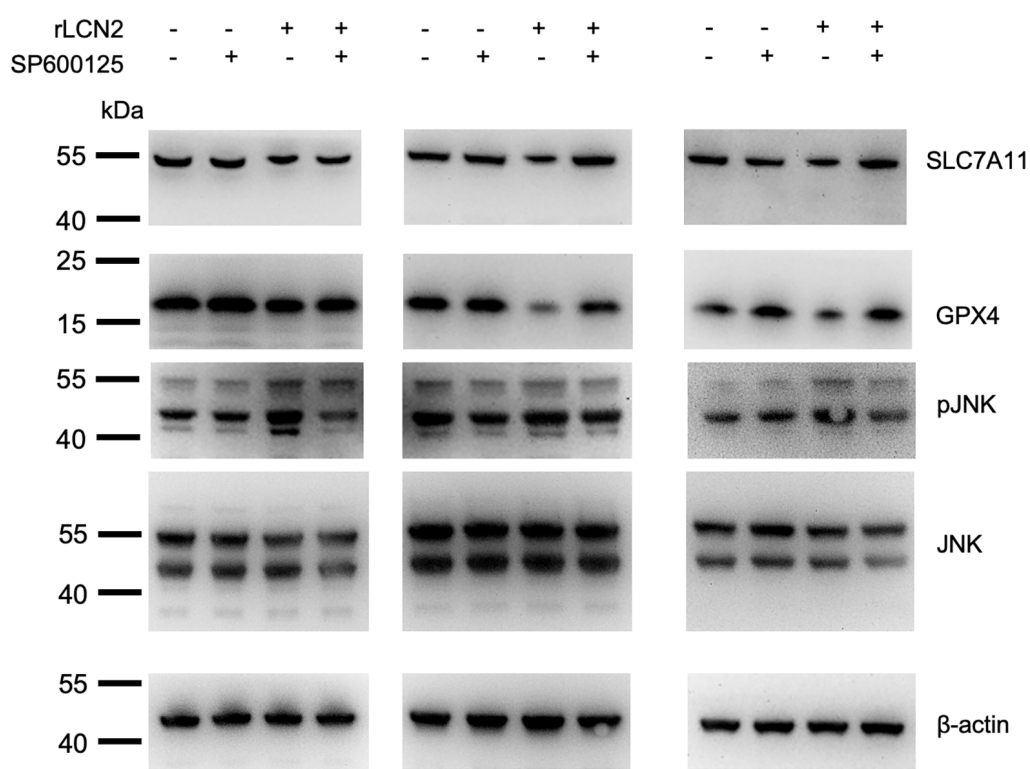

Western blot raw data for Figure 4C

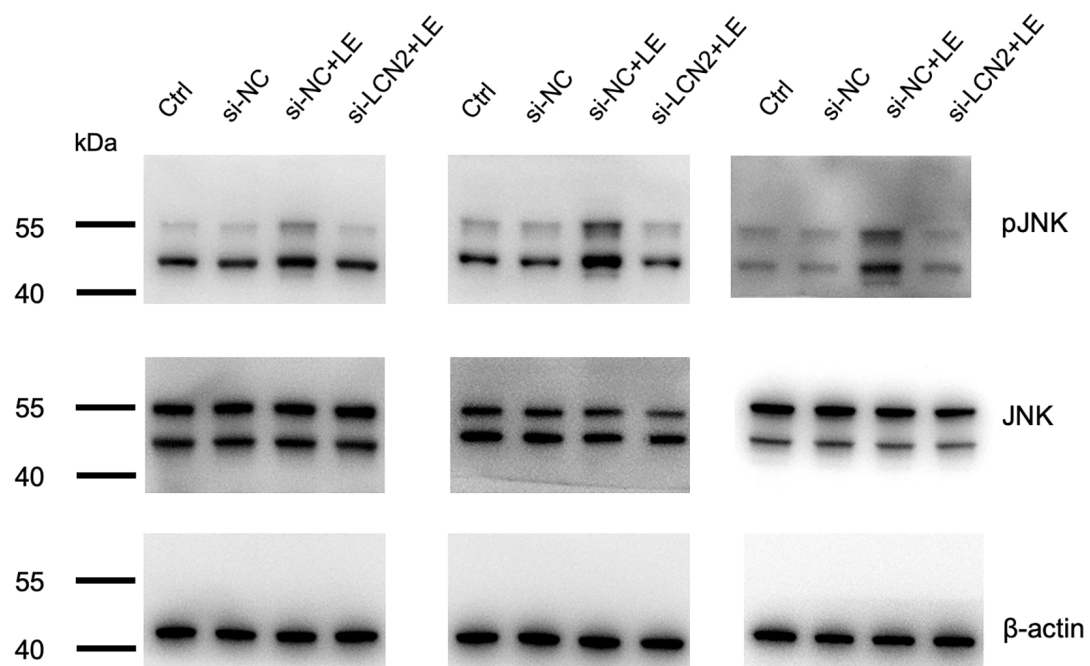

Western blot raw data for Figure 4J

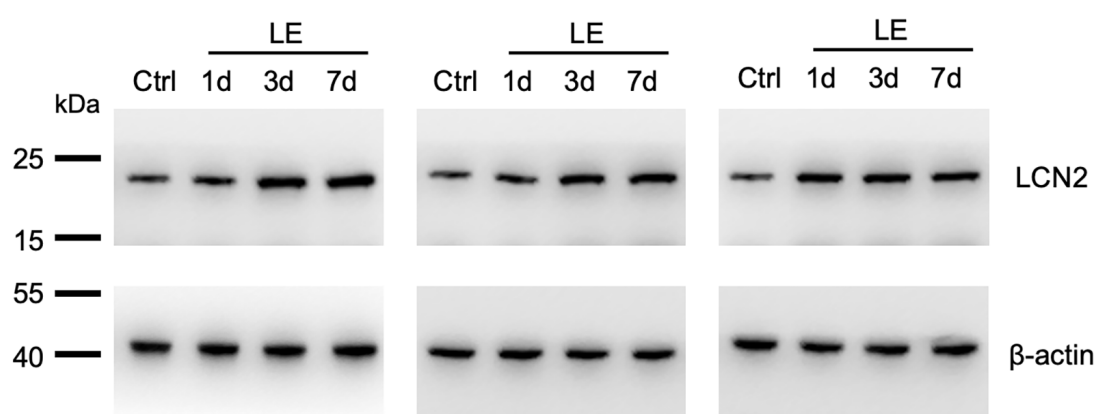

Western blot raw data for Figure 5B



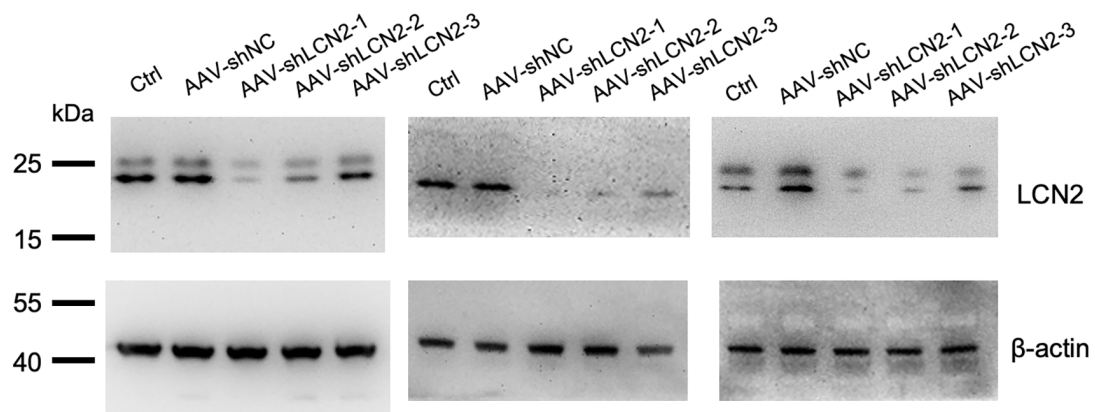

Western blot raw data for Figure 5D

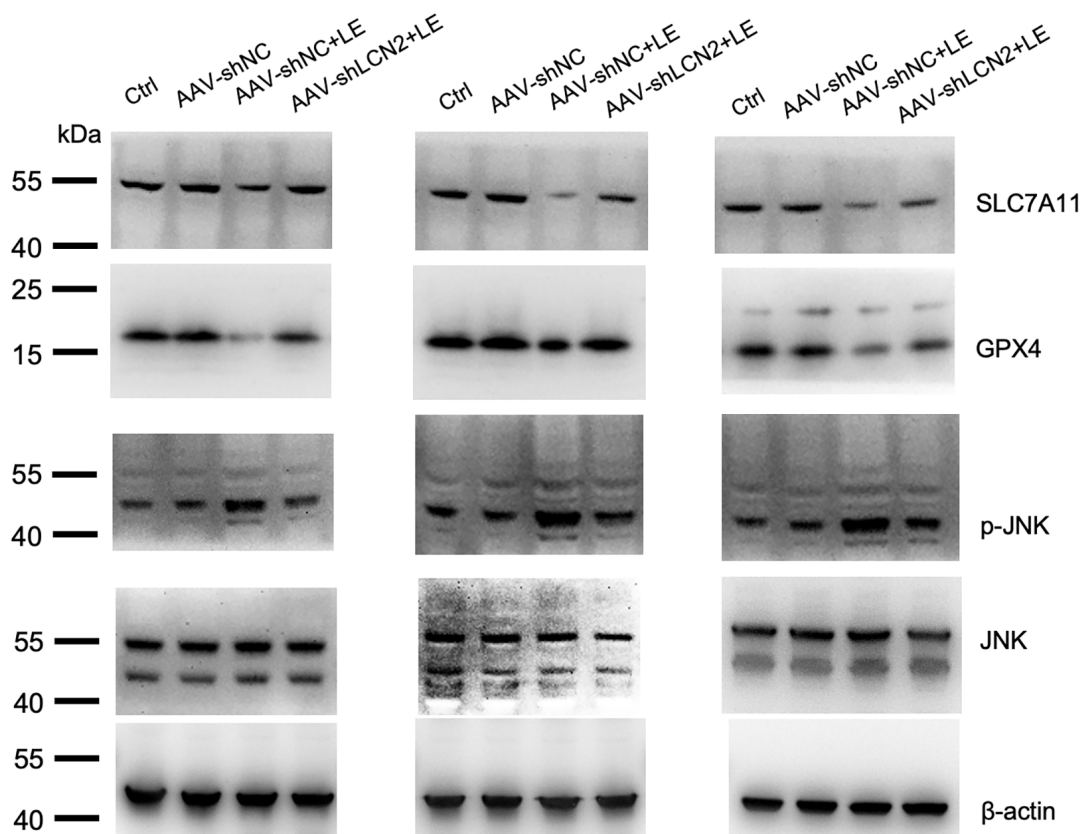

Western blot raw data for Figure 5I

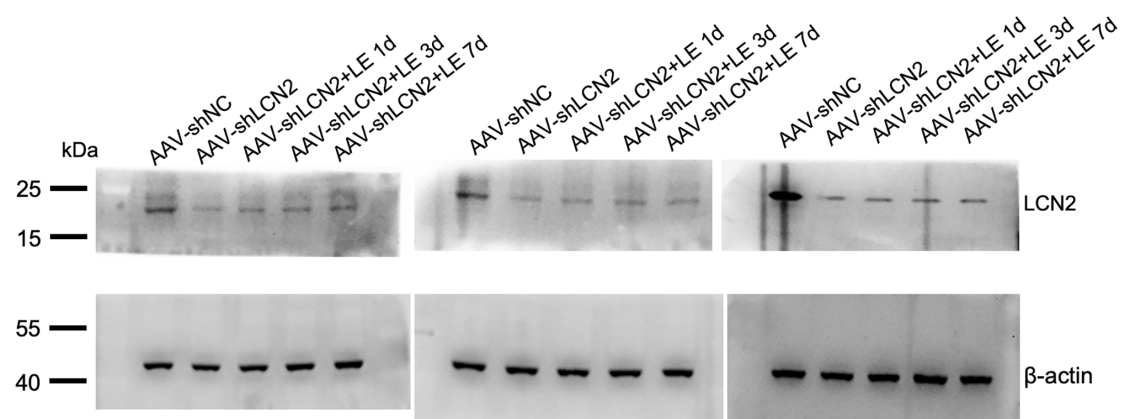

Western blot raw data for Additional file 5A

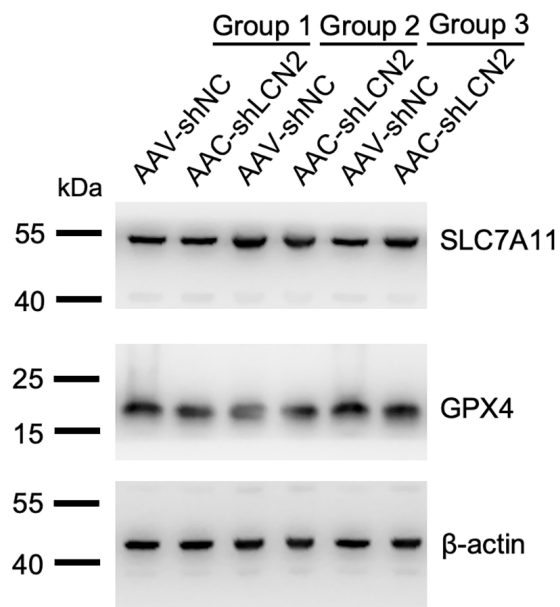

Western blot raw data for Additional file 6A

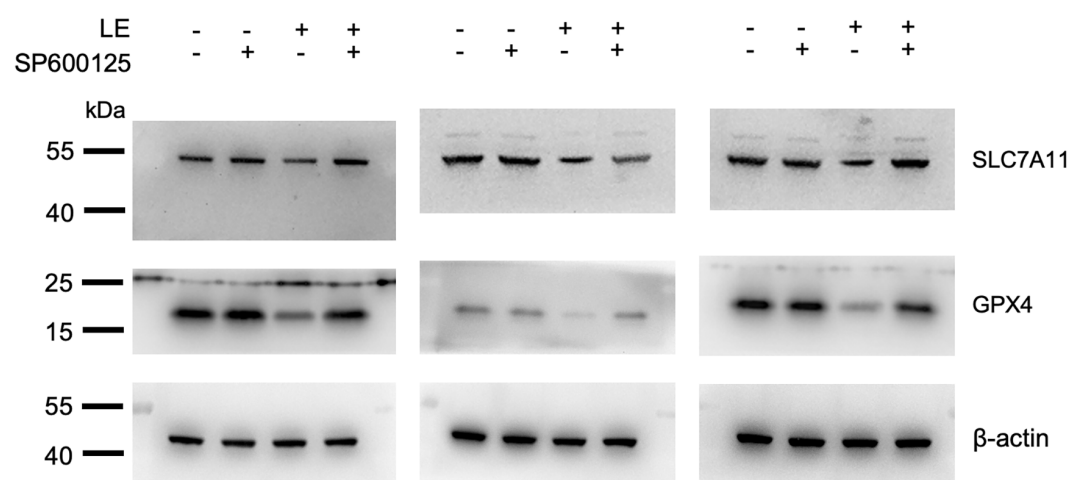

Western blot raw data for Additional file 8A

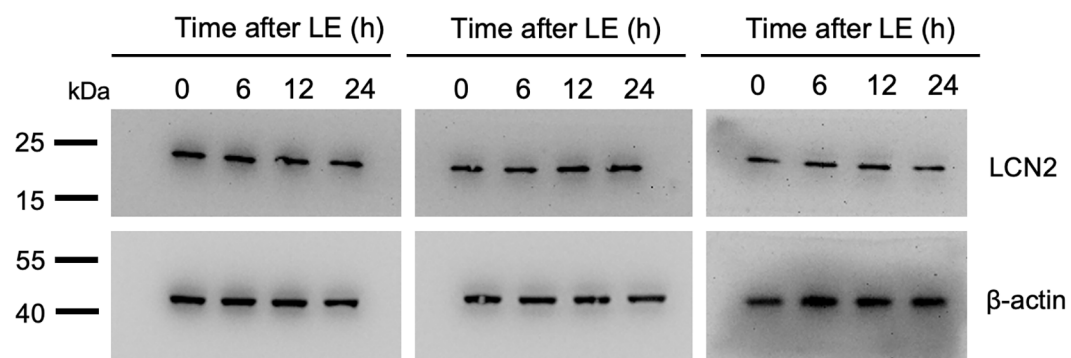

Western blot raw data for Additional file 9
